# Supplementary material for: Break-induced replication promotes formation of lethal joint molecules dissolved by Srs2
Source: PubMed Central journal article supplement (PMC5702615; doi:10.1038/s41467-017-01987-2), 2017-11-27
Supplement: 41467_2017_1987_MOESM1_ESM.pdf [file 41467_2017_1987_MOESM1_ESM.pdf]

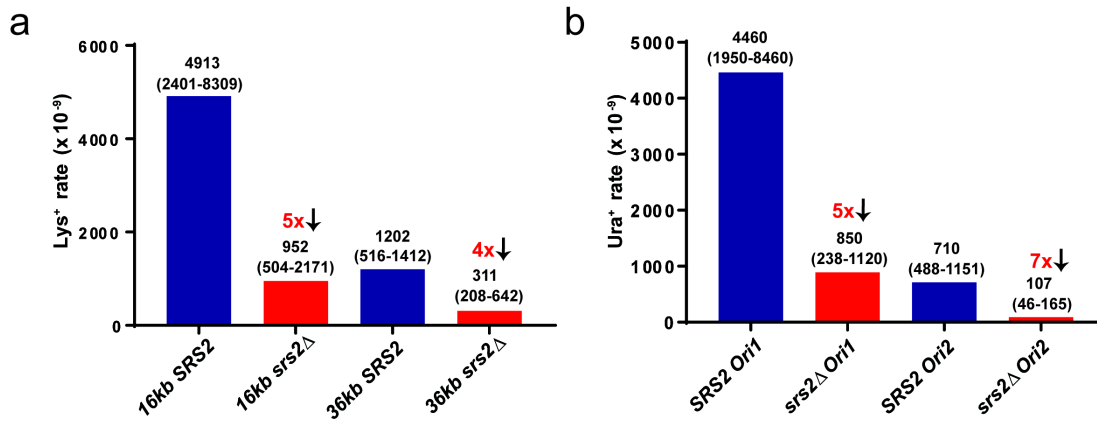

**Supplementary Figure 1.** The effects of *srs2*Δ on frameshift and base-substitution mutagenesis. (a) Analysis of frameshift mutagenesis in *SRS2* and *srs2*Δ using *lys2::A<sub>4</sub>* reporter<sup>34</sup> inserted in the donor chromosome at positions 16kb and 36kb from the DSB. *SRS2* (wild type) data are from<sup>34</sup>. (b) Analysis of base-substitution mutagenesis using *ura3-29* reporter inserted in two orientations (Ori1 and Ori2; <sup>10</sup>) at a position 36kb from DSB in *SRS2* and *srs2*Δ. Mutation rates are reported as the median value with range (in parenthesis) calculated based on  $\geq 4$  individual experiments. Downward arrows represent statistically significant decrease as compared to *SRS2* ( $P < 0.05$  using non-parametric Mann-Whitney test).

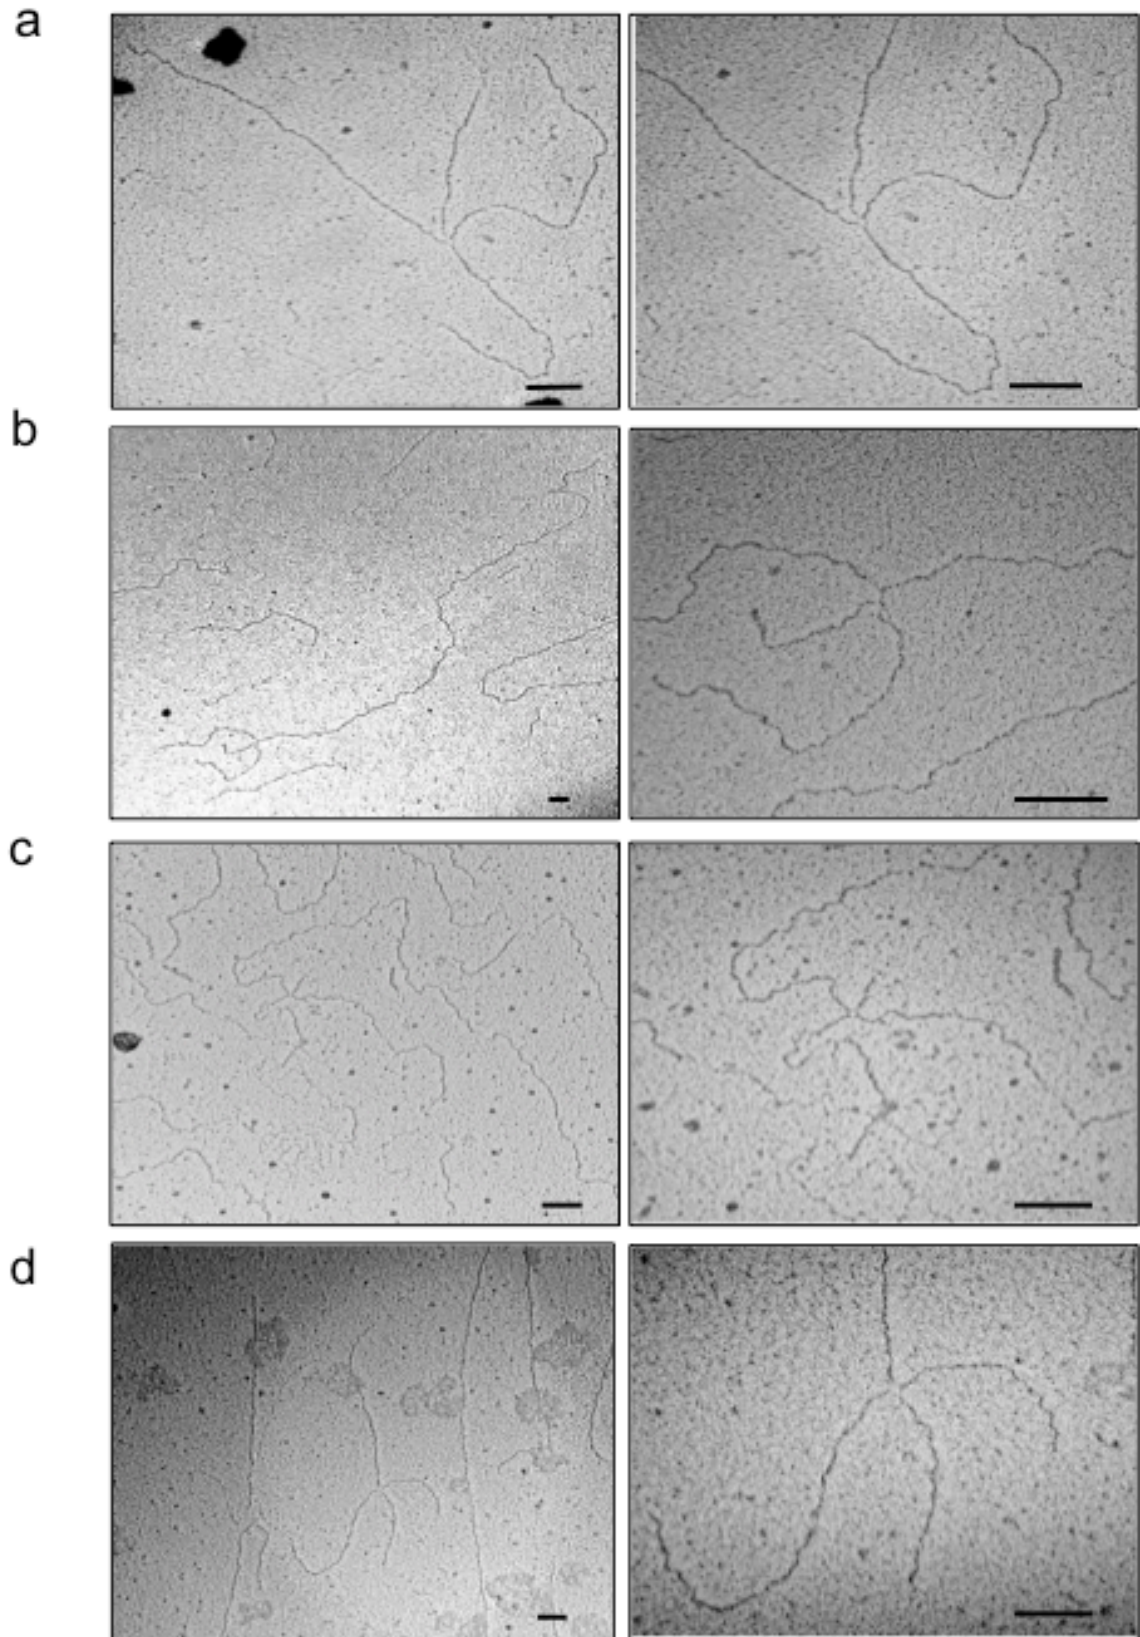

**Supplementary Figure 2.** Representative EM images showing 4-way junctions in *srs2Δ*. (a-d) Entire field images including 4-way junctions are shown (left) and enlarged views are shown (right). Scale bars correspond to 100nm.

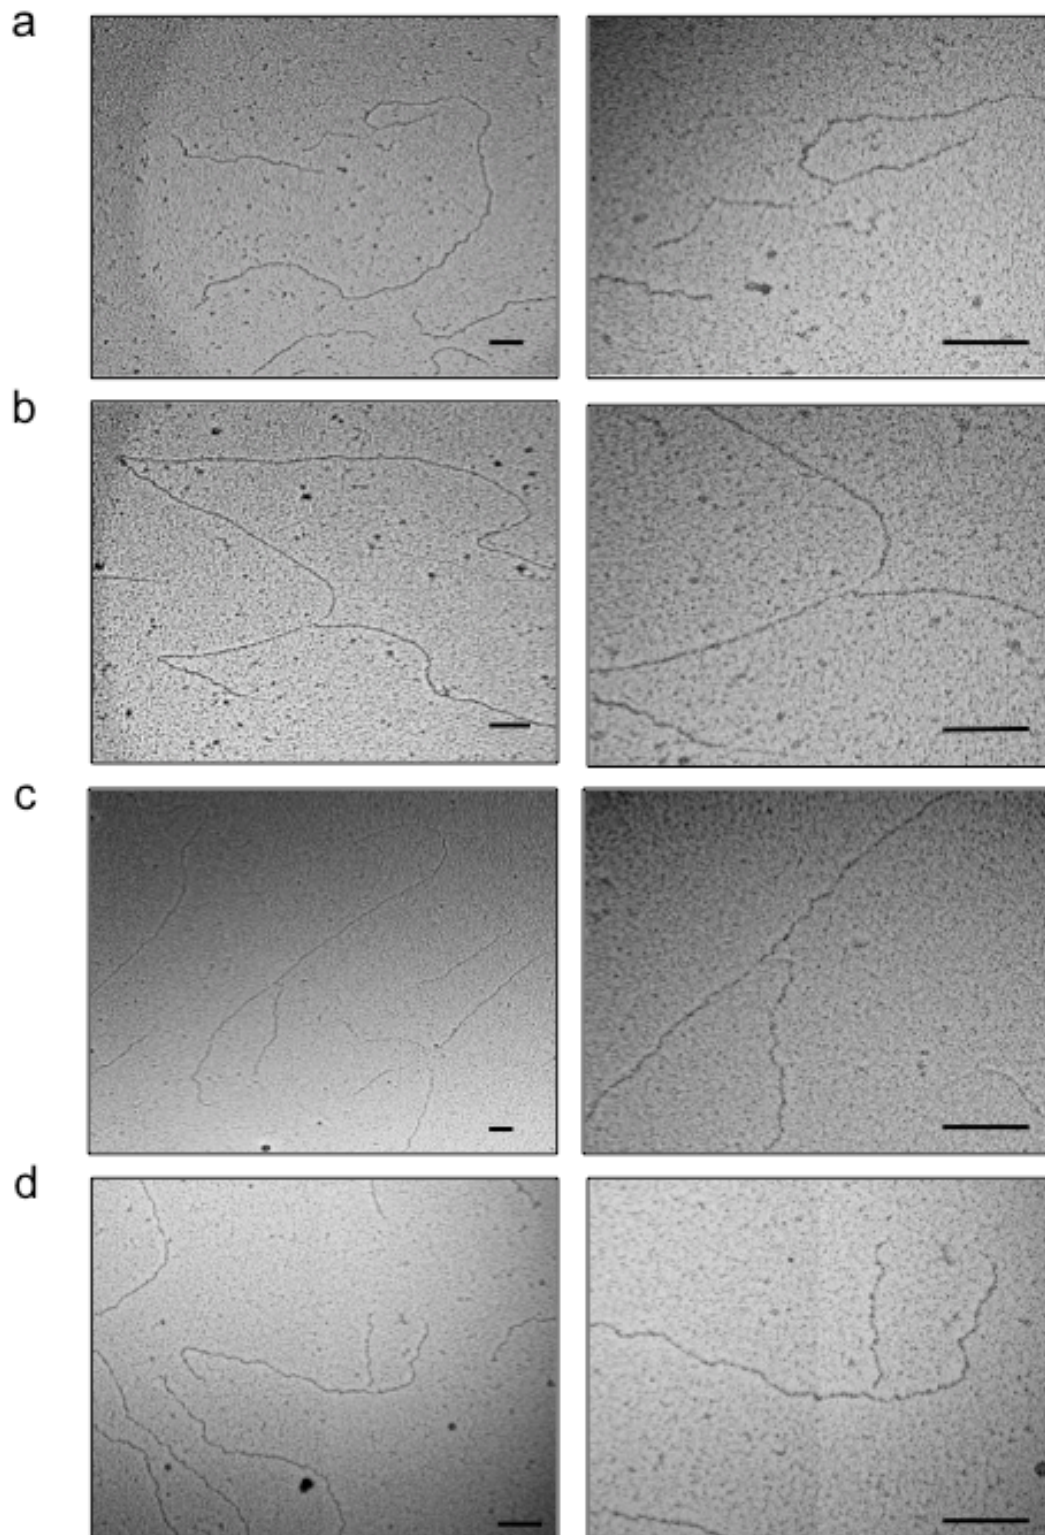

**Supplementary Figure 3.** Representative EM images showing 3-way junctions in *srs2Δ*. (a-d) Entire field images including 3-way junctions are shown (left) and enlarged views are shown (right). Scale bars correspond to 100nm.

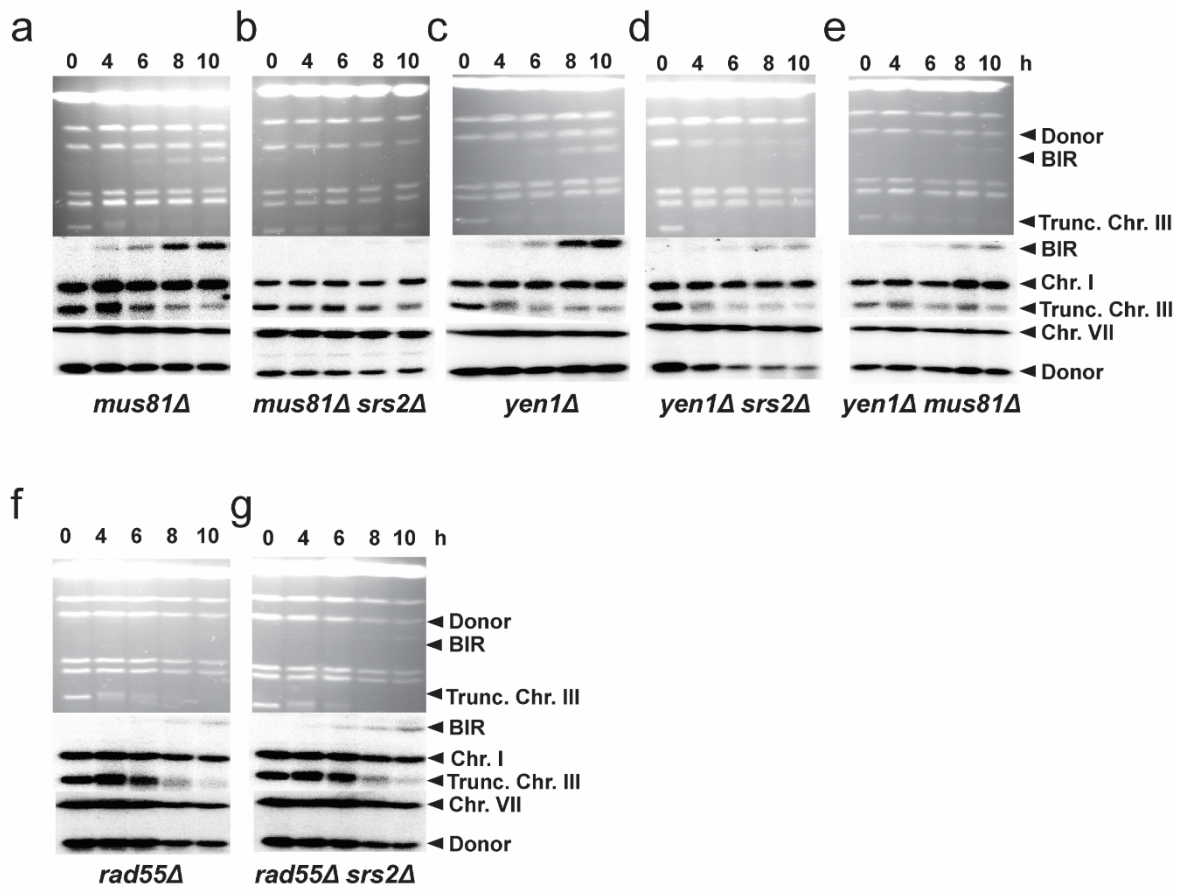

**Supplementary Figure 4.** Physical analysis of BIR using CHEF gel electrophoresis in the following mutants: (a) *mus81Δ*, (b) *mus81Δ srs2Δ*, (c) *yen1Δ*, (d) *yen1Δ srs2Δ*, (e) *yen1Δ mus81Δ*, (f) *rad55Δ*, and (g) *rad55Δ srs2Δ*.

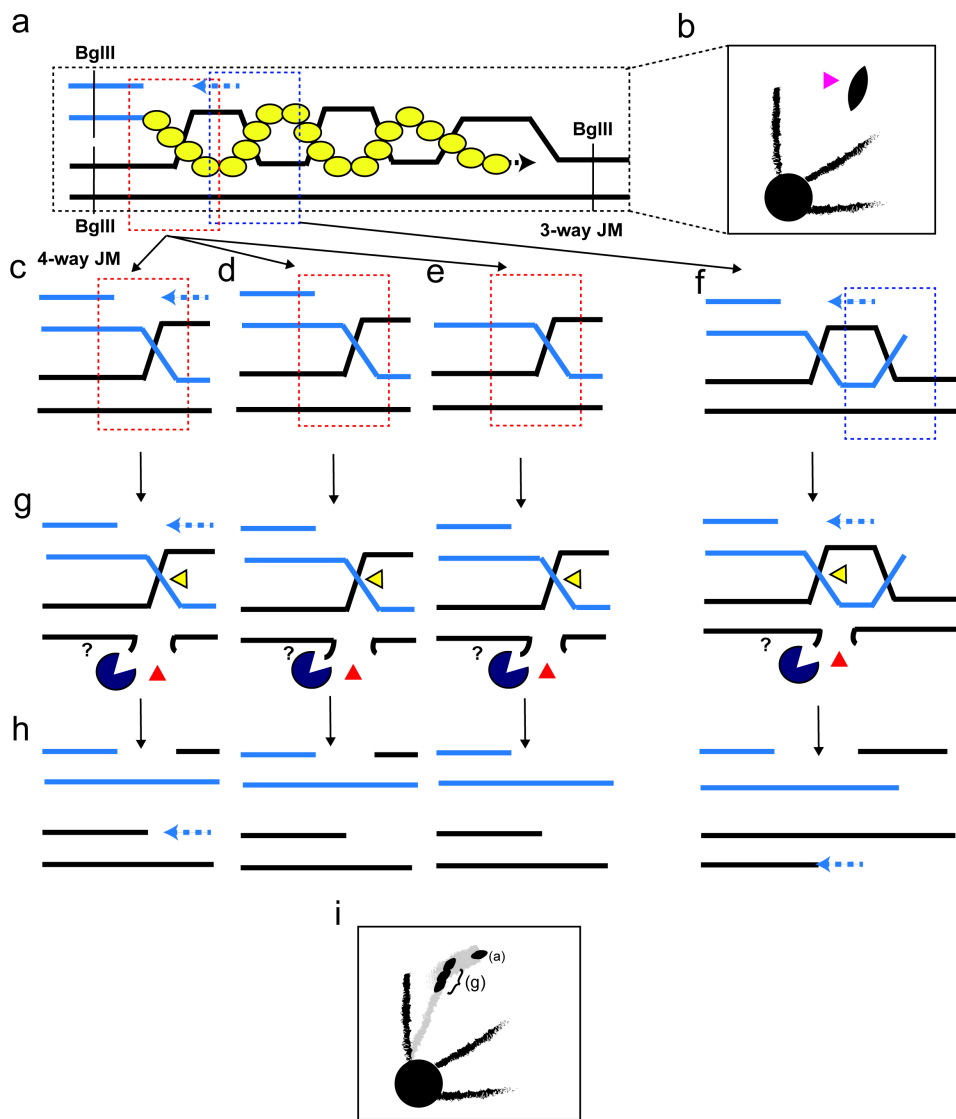

**Supplementary Figure 5.** Model showing the conversion of the ‘spike’ intermediate into the ‘rubble’ intermediate. (a) Schematic representing the multi-invasion intermediate (black dotted rectangle) that appears on 2D gels as a spike (b). We propose that only the BglIII sites located outside of this area (marked as BglIII) can be accessed and cut by BglIII, which leads to accumulation of high-molecular weight, highly branched intermediate that we call ‘spike’ (see pink arrow head in (b)). Multi-invasion intermediates include areas of 4-way junctions (red dotted rectangle), which can be further classified as junctions where all strands are dsDNA (c), one strand is single-stranded (d) and where two strands are partially or completely single-stranded (e). These intermediates can also include areas of 3-way junctions (dotted blue rectangle) (f). (g) Processing of 4-way and 3-way junctions by structure-specific endonucleases, Mus81 (red arrowhead) and Yen1 (yellow arrowhead), leads to formation of nicked-intermediates that could potentially be processed further by resection (blue pacman). (h) Processing and also isomerization of the nicked-intermediate lead to varying levels of complexity and possibly reduced molecular weight. The schematic depicts the resolution of just one of the 4-way or 3-way junction in the multi-invasion intermediate in the structure. At a given point these structures will be heterogeneous and their specific position along the trajectory will depend on the amount of ssDNA and complexity of the intermediates (i).

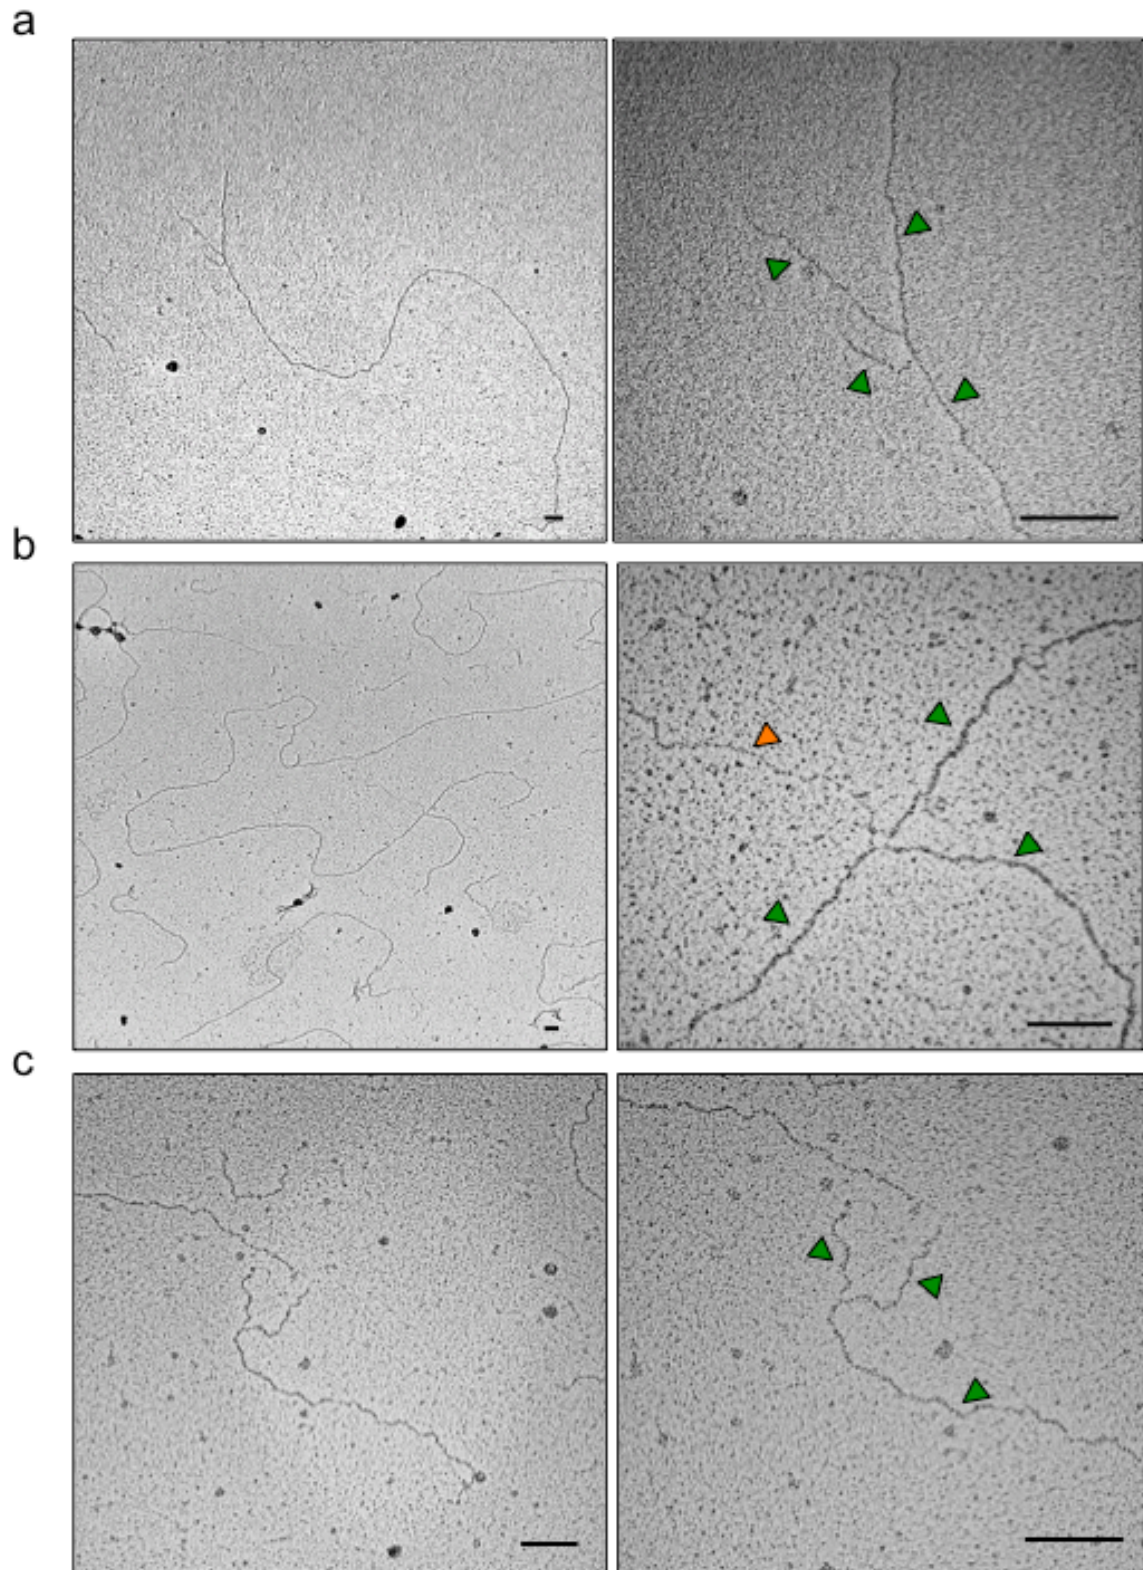

**Supplementary Figure 6.** Representative EM images showing joint molecules contributing to the rubble structure in *srs2Δ*. (a, b) 4-way junctions corresponding to the schematics drawn in Supplementary Fig. 5 (c) and (d) respectively. (c) 3- way junctions corresponding to the schematics drawn in Supplementary Fig. 5 (f). Green arrowheads denote double-stranded DNA and orange arrowheads depict single-stranded DNA. Entire field images including 3-way

junctions are shown (left) and enlarged views are shown (right). Note that rubble intermediates preserved in *srs2Δ* still include some 4-way and 3-way intermediates since the processing of these intermediates is incomplete. Scale bars correspond to 100nm.

a

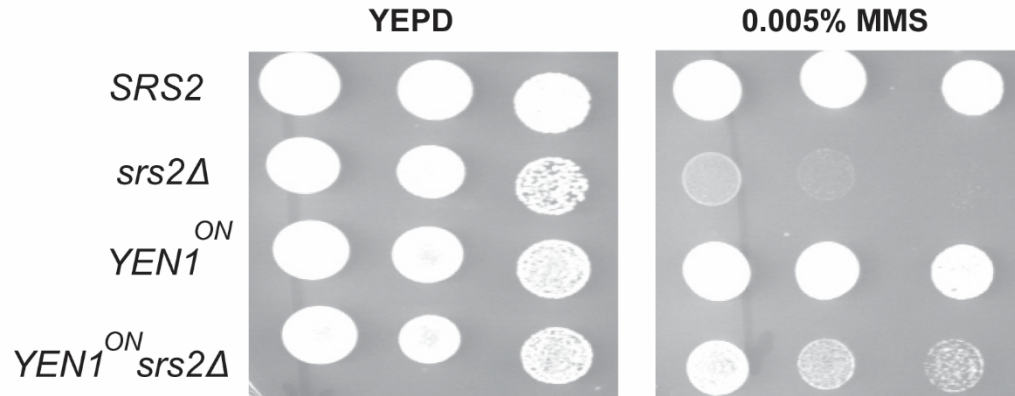

b

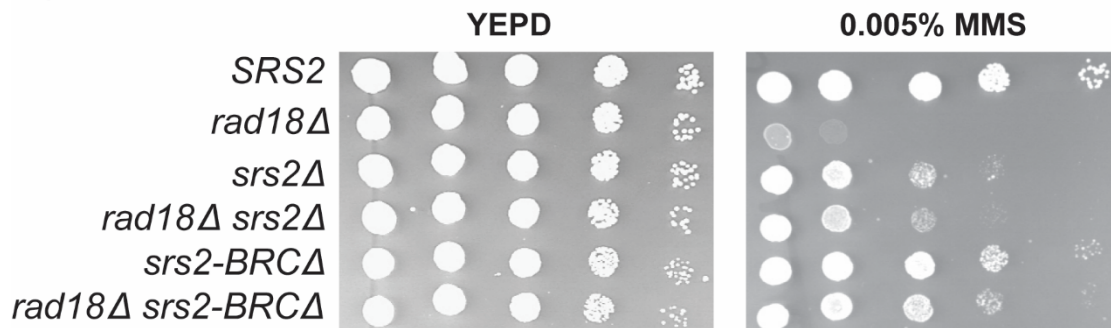

**Supplementary Figure 7.** MMS sensitivity of (a) *SRS2*, *srs2Δ*, *YEN1<sup>ON</sup>*, and *YEN1<sup>ON</sup> srs2Δ* strains. The MMS sensitivity was examined by plating of serially diluted cell cultures on YEPD and YEPD containing 0.005% MMS and (b) of *rad18Δ* in combination with *srs2-BRCΔ* and *srs2Δ* mutants.

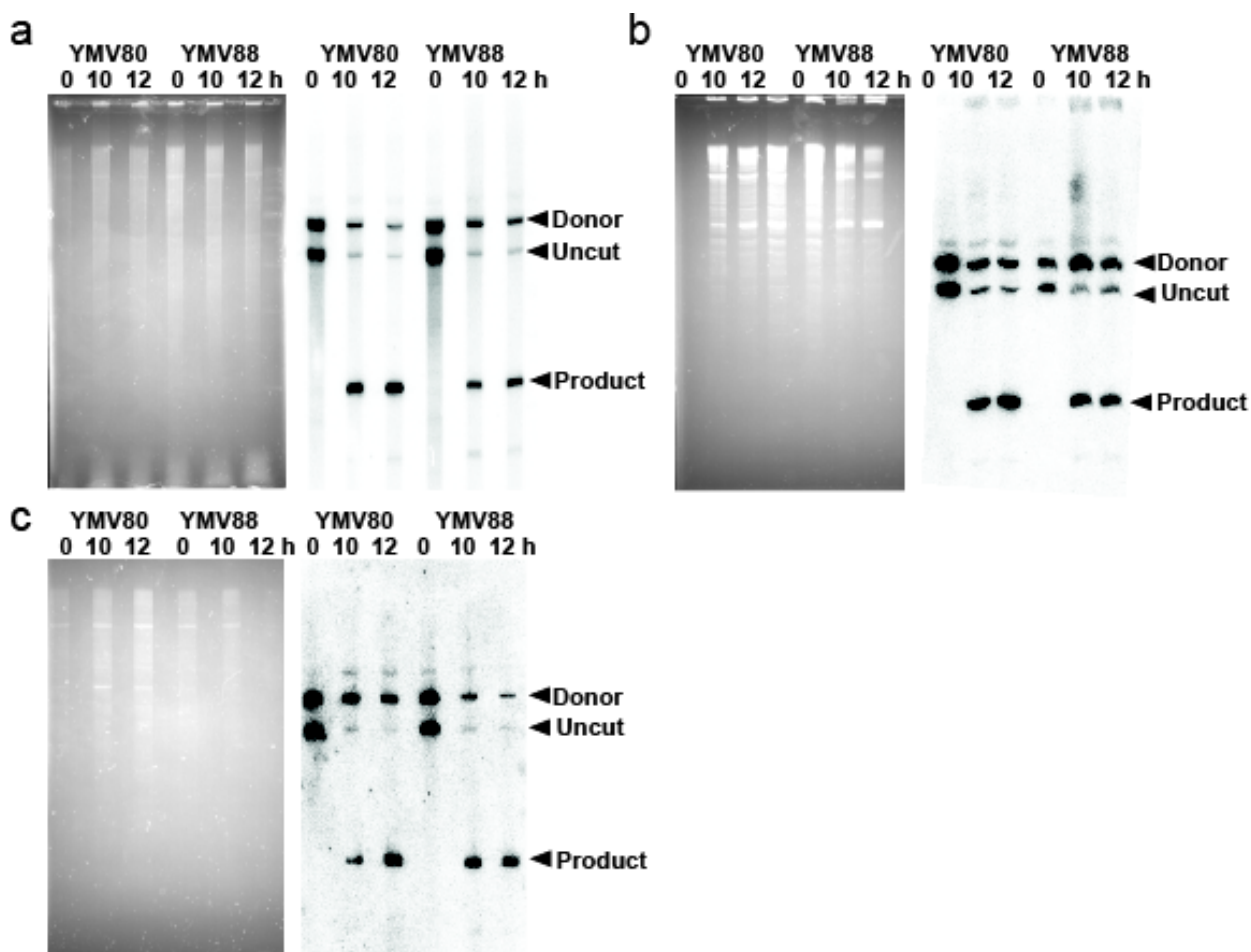

**Supplementary Figure 8.** Assaying DSB repair by SSA/BIR in YMV80 and YMV88 (a) Analysis of DSB repair following *Acc65I* digestion of genomic DNA and native gel electrophoresis as seen on ethidium bromide gels (left) following Southern analysis with hybridization to *LEU2*-specific probe (right). The location of *Acc65I* is the same as location of *KpnI* in <sup>41</sup>. (b) Analysis of DSB repair following in-plug digestion of chromosomal DNA with *Acc65I* as seen on EtBr gels (left) and following hybridization using *LEU2* probe (right). (c) Extraction of chromosomal DNA from agarose plugs by beta-agarase enzyme followed by *Acc65I* digestion as seen on EtBr gels (left) and following hybridization using *LEU2* probe (right).



**Supplementary Table 1: Strain List**

| <b>Strain Name</b> | <b>Genotype</b>                                                                                                                                                                            | <b>Reference</b> |
|--------------------|--------------------------------------------------------------------------------------------------------------------------------------------------------------------------------------------|------------------|
| AM3110             | <i>hmlΔ::ADE1/hmlΔ::ADE3 MATα-LEU2-tel/MATα-inc<br/>hmrΔ::HPH FS2Δ::NAT/FS2 leu2/leu2-3,112 thr4 ura3-52<br/>ade3::GAL::HO ade1 met13 trp1::p304-BrdU<br/>snt1::(TEF1/BSD)<sub>5</sub></i> | This study       |
| AM3257             | AM3110, but <i>srs2::KANMX</i>                                                                                                                                                             | This study       |
| AM3350             | AM3110, but <i>srs2-K41A</i>                                                                                                                                                               | This study       |
| AM3601             | AM3110, but <i>srs2-BRC1</i>                                                                                                                                                               | This study       |
| AM3332             | AM3110, but <i>mus81::ble<sup>r</sup></i>                                                                                                                                                  | This study       |
| AM3610             | AM3332, but <i>srs2::KANMX</i>                                                                                                                                                             | This study       |
| AM3312             | AM3110, but <i>yen1::HPHMX</i>                                                                                                                                                             | This study       |
| AM3322             | AM3312, but <i>srs2::KANMX</i>                                                                                                                                                             | This study       |
| AM3451             | AM3312, but <i>mus81::ble<sup>r</sup></i>                                                                                                                                                  | This study       |
| AM3572             | AM3110, but <i>YEN1<sup>ON</sup></i>                                                                                                                                                       | This study       |
| AM3654             | AM3572, but <i>srs2::KANMX</i>                                                                                                                                                             | This study       |
| AM3658             | AM3654, but <i>mus81::ble<sup>r</sup></i>                                                                                                                                                  | This study       |
| AM3391             | AM3257, but <i>Mata-inc-LEU2-tel</i>                                                                                                                                                       | This study       |
| AM3457             | AM3110, but <i>rad55::ble<sup>r</sup></i>                                                                                                                                                  | This study       |
| AM3462             | AM3457, but <i>srs2::KANMX</i>                                                                                                                                                             | This study       |
| AM3485             | AM3350, but <i>rad55::ble<sup>r</sup></i>                                                                                                                                                  | This study       |
| AM3489             | AM3601, but <i>rad55::ble<sup>r</sup></i>                                                                                                                                                  | This study       |
| AM3340             | AM3110, but <i>rfal-t33</i>                                                                                                                                                                | This study       |
| AM3362             | AM3340, but <i>srs2::KANMX</i>                                                                                                                                                             | This study       |
| AM3768             | AM3110, but <i>siz1::KANMX</i>                                                                                                                                                             | This study       |
| AM3864             | AM3601, but <i>siz1::KANMX</i>                                                                                                                                                             | This study       |

|        |                                                                                                               |               |
|--------|---------------------------------------------------------------------------------------------------------------|---------------|
| AM1291 | AM1003, but <i>lys2::insA<sub>4</sub></i> reporter inserted at 16kb position                                  | <sup>34</sup> |
| AM3205 | AM1291, but <i>srs2::KANMX</i>                                                                                | This study    |
| AM1482 | AM1003, but <i>lys2::insA<sub>4</sub></i> reporter inserted at 36kb position                                  | <sup>34</sup> |
| AM3206 | AM1482 but, <i>srs2::KANMX</i>                                                                                | This study    |
| AM2944 | AM1003, but <i>ura3-29</i> reporter inserted at 36kb in Orientation 1                                         | <sup>10</sup> |
| AM3201 | AM2944, but <i>srs2::ble<sup>r</sup></i>                                                                      | This study    |
| AM2951 | AM1003, but <i>ura3-29</i> reporter inserted at 36kb in Orientation 2                                         | <sup>10</sup> |
| AM3200 | AM2951, but <i>srs2::ble<sup>r</sup></i>                                                                      | This study    |
| AM4064 | AM3110, but <i>rad18::HPHMX</i>                                                                               | This study    |
| AM4067 | AM3257, but <i>rad18::HPHMX</i>                                                                               | This study    |
| AM4068 | AM3601, but <i>rad18::HPHMX</i>                                                                               | This study    |
| tGI354 | <i>hmlΔ::ADE1 MATa-inc hmrΔ::ADE1 ade1 leu2-3,112 lys5 trp1::hisG ura3-52 ade3::GAL::HO arg5,6::GAL::MATa</i> | <sup>28</sup> |
| tGI383 | tGI354, but <i>srs2::LEU2</i>                                                                                 | <sup>28</sup> |
| tGI572 | tGI354, but <i>rad55::LEU2</i>                                                                                | This study    |
| yDS178 | tGI354, but <i>srs2::TRP1, rad55::LEU2</i>                                                                    | This study    |
| yAP47  | tGI354, but <i>siz1::KanMX</i>                                                                                | This study    |
| yAP53  | tGI383, but <i>siz1::KanMX</i>                                                                                | This study    |
| yGI96  | tGI354, but <i>pol30-K127R::KanMX</i>                                                                         | This study    |
| yGI99  | tGI354, but <i>pol30-K164R::KanMX</i>                                                                         | This study    |
| yGI102 | yGI96, but <i>K164R::KanMX</i>                                                                                | This study    |
| AM3918 | tGI354, but <i>srs2-BRCΔ</i>                                                                                  | This study    |
| AM3967 | AM3918, but <i>siz1::KanMX</i>                                                                                | This study    |
| YMV80  | <i>hmlΔ::ADE1 MATaΔ::hisG hmrΔ::ADE1 leu2-cs ade3::GAL::HO ade1 lys5 ura3-52</i>                              | <sup>28</sup> |

|        |                               |               |
|--------|-------------------------------|---------------|
| YMV88  | YMV80, but <i>srs2::KANMX</i> | <sup>28</sup> |
| AM3724 | YMV80, but <i>srs2-BRCΔ</i>   | This study    |

**Supplementary Table 2:** Analysis of BIR intermediates by electron microscopy

| <b>Strain</b> | <b>3-way JM<sup>a</sup></b> | <b>4-way JM<sup>a</sup></b> | <b>linear</b> | <b>Total</b> |
|---------------|-----------------------------|-----------------------------|---------------|--------------|
| <b>No-DSB</b> | 1                           | 1                           | 1401          | 1403         |
| <i>srs2Δ</i>  | 68 **                       | 32*                         | 3760          | 3860         |
| <b>SRS2</b>   | 34                          | 13                          | 3348          | 3395         |

<sup>a</sup> 3-way and 4-way junctions (joint molecules).

**Supplementary Table 2.** Analysis of BIR intermediates by electron microscopy. Table shows the number of 3-way junctions, 4-way junctions and of linear molecules that were analyzed during BIR in *SRS2* and *srs2Δ*. Strains lacking HO-endonuclease cut site (no-DSB) were arrested at G2 using nocodazole and were used as a control. \*\* and \* indicate significant differences from *SRS2* with P-values of 0.0066 and 0.0379, respectively.

**Supplementary Table 3: Primer List**

| <b>Oligo Name</b> | <b>Description</b>                                                        | <b>5' – 3' sequence</b>                                                                                             |
|-------------------|---------------------------------------------------------------------------|---------------------------------------------------------------------------------------------------------------------|
| OL550             | FP: To amplify <i>srs2::KANMX</i> for deletion of <i>SRS2</i>             | GTGATCGCTGACTCTGGTA<br>TTGGG                                                                                        |
| OL551             | RP: To amplify <i>srs2::KANMX</i> for deletion of <i>SRS2</i>             | CCGACGGATGTTGATGACC<br>CATTG                                                                                        |
| OL552             | FP: To confirm deletion of <i>SRS2</i>                                    | GCTAGTCAAGAGCGATCCC<br>CACTT                                                                                        |
| OL553             | RP: To confirm deletion of <i>SRS2</i>                                    | CCTCGAATTCATTGACTTG<br>GATG                                                                                         |
| OL2684            | FP: To amplify <i>mus81::ble<sup>r</sup></i> for deletion of <i>MUS81</i> | GCCCTTTAAGAGTGGCATC<br>AACATTGGCGTAAACAAAG<br>TTCAAAGGATTGATACGA<br>ACACACATTCTAGCATGA<br>AAGCgacatggaggcccagaatac  |
| OL2685            | RP: To amplify <i>mus81::Ble<sup>r</sup></i> for deletion of <i>MUS81</i> | ATATATGTATATATTAGTTA<br>AAAGAATATCATCACTTTT<br>TTCTTTATAAAACCTTGCAG<br>GGATGACTATATTTCAAAT<br>TGcagtatagcgaccagcatc |
| OL236             | FP: To confirm deletion of <i>MUS81</i>                                   | GTTCTTGCTGCTCGTAAGA<br>GACAC                                                                                        |
| OL537             | RP: To confirm deletion of <i>MUS81</i>                                   | CATATGCTTCTGCGATGGG<br>CAGCG                                                                                        |
| OL1504            | FP: To amplify <i>yen1::HPHMX</i> for deletion of <i>YEN1</i>             | GGTAGTATATTGGCATTGA<br>ACACTGG                                                                                      |
| OL1505            | RP: To amplify <i>yen1::HPHMX</i> for deletion of <i>YEN1</i>             | CCTACTTTACAATCCACTAT<br>ACGGTC                                                                                      |
| OL1506            | FP: To confirm deletion of <i>YEN1</i>                                    | GGCTATCCTTTTTAGACTCT<br>TCTCC                                                                                       |

|        |                                                                                  |                                                                                                                        |
|--------|----------------------------------------------------------------------------------|------------------------------------------------------------------------------------------------------------------------|
| OL1507 | RP: To confirm deletion of <i>YEN1</i>                                           | AATCCCATATTTGTGAGACACCC                                                                                                |
| OL2751 | FP: To amplify <i>rad55::Ble<sup>r</sup></i> for deletion of <i>RAD55</i>        | CGCTATCAAAGATGTCAAG<br>TACATTAAGGAAAGCTTTT<br>AGATAAGGAAAAGAACTTA<br>TTAATAATATATAATATGA<br>AAAT gacatggaggcccagaatac  |
| OL2752 | RP: To amplify <i>rad55::Ble<sup>r</sup></i> for deletion of <i>RAD55</i>        | TTTCTTTGTAGTTGTTGGGT<br>GGAATGTTGTCGTTTTTCCA<br>TTTTTTATTGTTTTCGGTTTT<br>CGGTTTTTTTATTTTACTA<br>cagtatagcgaccagcattc   |
| OL2753 | FP: To confirm deletion of <i>RAD55</i>                                          | GCGGAGGTCCCCTAAGTTC<br>TTCAC                                                                                           |
| OL2754 | RP: To confirm deletion of <i>RAD55</i>                                          | TCGCCGCGTTGCAAGTACA<br>TTGTG                                                                                           |
| OL2690 | FP: To create <i>srs2-BRCΔ</i> by insertion of pCORE for <i>delitto perfetto</i> | CATCCAAAATCAATGGCAA<br>TTACGCTCCTAAAAGTAGA<br>GTTAAAAGTCCAGAAAAAA<br>GGTACGCTCCAGAACTAC<br>ATCAgagctcgttttcgacctgg     |
| OL2691 | RP: To create <i>srs2-BRCΔ</i> by insertion of pCORE for <i>delitto perfetto</i> | AATGAAACTCCTGCCTACT<br>AGGTACATTAGTTGTTGAA<br>ACGTATTGAGGTGCATACA<br>CCTTTTTCTTTGTAGGAGAA<br>TGGtcctaccattaagtgate     |
| OL2709 | FP: To remove pCORE to create <i>Srs2-BRCΔ</i>                                   | TCGAAACGCAAACTCTAT<br>ATTCCCACAGAAGAACTT<br>ATTGAAAAATCAGGAGTTT<br>CATTCTTCTACTGGGAAAA<br>ATATTCCTTTTCTGAGAAG<br>AGAAG |
| OL2710 | RP: To remove pCORE to create <i>Srs2-BRCΔ</i>                                   | CTTCTTTCTCAGAAAAGG<br>AATATTTTTCCAGTAGAA<br>GAATGAAACTCCTGATTTT<br>TCAATAAGTTTCTTCTGTGG<br>GAATATAGAGTTTTGCGTT<br>TCGA |
| OL3264 | FP: To delete <i>rad18::HPHMX</i>                                                | ATGGACCACCAATAACCA<br>CTGCAAGCGACTTCACGAC<br>TACTTCAATACCGAGCCTG<br>TACCAATTGGATACACTTTT                               |

|        |                                                         |                                                                                                                    |
|--------|---------------------------------------------------------|--------------------------------------------------------------------------------------------------------------------|
|        |                                                         | GAcatagccactagtgatctg                                                                                              |
| OL3265 | RP: To delete <i>rad18::HPHMX</i>                       | TTAATTGTTACCGGGTGGG<br>TCTTTACTATATTCATTCAA<br>GTCCATTAATTCTCTTGATA<br>AGTCAGCATCAGTTGAATC<br>TTagctgaagcttcgtacgc |
| OL3266 | FP: To confirm deletion of <i>RAD18</i>                 | CCCGCTCTTCTATGGTATAA<br>TCAA                                                                                       |
| OL3268 | RP: To confirm deletion of <i>RAD18</i>                 | CCAGGAACTCACTTCTCAG<br>CAAGG                                                                                       |
| OL2641 | FP: To amplify <i>siz1::KANMX</i> to delete <i>SIZ1</i> | CCATTTTAGAGCGAGCAGA<br>AGGTT                                                                                       |
| OL2642 | RP: To amplify <i>siz1::KANMX</i> to delete <i>SIZ1</i> | GAATAAGGTTGGTGTCGGA<br>ATACC                                                                                       |
| OL2643 | FP: To confirm deletion of <i>SIZ1</i>                  | AAATCATCAACCTTGAGGC<br>TAGGA                                                                                       |
| OL2644 | RP: To confirm deletion of <i>SIZ1</i>                  | AAAACCTGGCGTTTACTCCT<br>GGTCA                                                                                      |
